# S2 Fig

## Sex-stratified results for selected outcomes

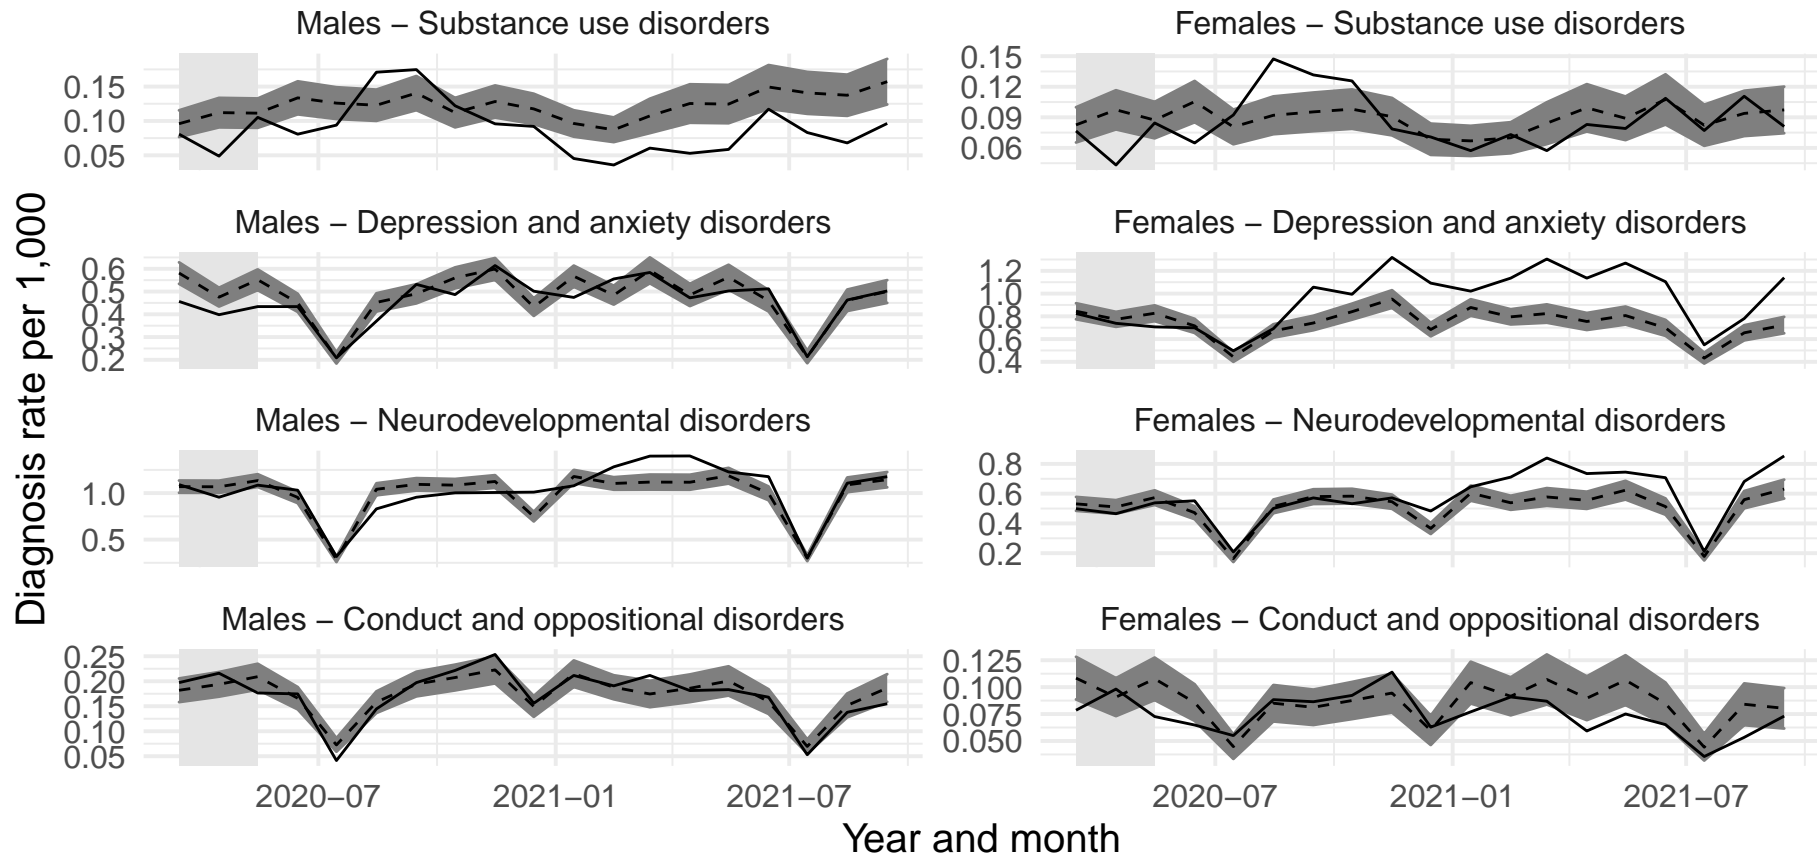

Rate — Observed - - Predicted with 95% CI
